# Supplementary material
Source: Research Square preprint supplement (doi:10.21203/rs.3.rs-7999037/v1)
Supplement: Supplementary file 1 [file b79e51b98811e06cf573bc19.docx]

**Supplementary tables**

Table S1. Detailed descriptive statistics for psychosomatic complaints (n = 5,346).

|  | All | | Females (n = 2,706) | Males (n = 2,640) |
| --- | --- | --- | --- | --- |
|  | n | % | % | % |
| Stomach ache |  |  |  |  |
| Less often or never | 1,784 | 33.4 | 18.3 | 48.8 |
| Some time a month | 2,118 | 39.6 | 44.9 | 34.2 |
| Weekly | 689 | 12.9 | 16.3 | 9.4 |
| More often than weekly | 640 | 12.0 | 17.5 | 6.3 |
| Daily | 115 | 2.2 | 3.1 | 1.2 |
|  |  |  |  |  |
| Headache |  |  |  |  |
| Less often or never | 1,478 | 27.7 | 18.7 | 36.8 |
| Some time a month | 1,787 | 33.4 | 31.0 | 35.9 |
| Weekly | 876 | 16.4 | 18.4 | 14.4 |
| More often than weekly | 928 | 17.4 | 23.7 | 10.9 |
| Daily | 277 | 5.2 | 8.2 | 2.1 |
|  |  |  |  |  |
| Sleeping problems |  |  |  |  |
| Less often or never | 1,515 | 28.3 | 24.5 | 32.3 |
| Some time a month | 1,374 | 25.7 | 25.1 | 26.4 |
| Weekly | 839 | 15.7 | 15.9 | 15.5 |
| More often than weekly | 1,115 | 20.9 | 23.7 | 18.0 |
| Daily | 503 | 9.4 | 10.9 | 7.8 |
|  |  |  |  |  |
| Frequency of psychosomatic complaints (≥1 complaints) |  |  |  |  |
| Less often or never | 433 | 8.1 | 3.9 | 12.4 |
| Some time a month | 1,506 | 28.2 | 23.5 | 33.0 |
| Weekly | 1,042 | 19.5 | 18.5 | 20.5 |
| More often than weekly | 1,632 | 30.5 | 36.1 | 24.8 |
| Daily | 733 | 13.7 | 18.0 | 9.4 |
|  |  |  |  |  |
| Frequency of psychosomatic complaints (≥2 complaints) |  |  |  |  |
| Less often or never | 1,431 | 26.8 | 15.9 | 37.9 |
| Some time a month | 2,083 | 39.0 | 39.7 | 38.3 |
| Weekly | 889 | 16.6 | 19.5 | 13.7 |
| More often than weekly | 803 | 15.0 | 21.1 | 8.8 |
| Daily | 140 | 2.6 | 3.8 | 1.4 |
|  |  |  |  |  |
| Type of complaint (more often than weekly/daily) |  |  |  |  |
| Stomach ache | 755 | 14.1 | 20.6 | 7.5 |
| Headache | 1,205 | 22.5 | 31.9 | 13.0 |
| Sleeping problems | 1,618 | 30.3 | 34.6 | 25.8 |
|  |  |  |  |  |
| Number of complaints (more often than weekly/daily) |  |  |  |  |
| 0 complaints | 2,981 | 55.8 | 45.9 | 65.9 |
| 1 complaint | 1,422 | 26.6 | 29.2 | 23.9 |
| ≥ 2 complaints | 943 | 17.6 | 24.9 | 10.2 |

Figure S1. Distribution of psychosomatic complaint scores for the whole sample and for females and males separately.

Table S2. Ineligibility for upper secondary school at age 16 and failure to graduate from upper secondary school by age 20: Differences in probability with 95% confidence intervals (95% CI) from Linear Probability Models (LPM) among females and males, respectively, accounting for class fixed effects.

|  | Ineligibility for upper secondary school | | | | Non-graduation from upper secondary school | | | |
| --- | --- | --- | --- | --- | --- | --- | --- | --- |
|  | Females (n = 2,699a) | | Males (n = 2,630b) | | Females (n = 2,458c) | | Males (n = 2,329d) | |
|  | Coefficient | 95% CI | Coefficient | 95% CI | Coefficient | 95% CI | Coefficient | 95% CI |
|  |  |  |  |  |  |  |  |  |
| Psychosomatic complaints | 0.007*** | 0.003, 0.011 | 0.008** | 0.003, 0.013 | 0.014*** | 0.008, 0.020 | 0.014*** | 0.006, 0.021 |
|  |  |  |  |  |  |  |  |  |
| Parental tertiary education |  |  |  |  |  |  |  |  |
| None | 0.073*** | 0.047, 0.099 | 0.107*** | 0.074, 0.014 | 0.014 | -0.026, 0.054 | 0.074*** | 0.035, 0.114 |
| One parent | 0.017 | -0.006, 0.040 | 0.026 | -0.002, 0.053 | -0.014 | -0.050, 0.022 | 0.053* | 0.012, 0.093 |
| Both parents (ref.) | 0.000 | - | 0.000 | - | 0.000 | - | 0.000 | - |
|  |  |  |  |  |  |  |  |  |
| Migration background |  |  |  |  |  |  |  |  |
| Born in Sweden to two Swedish-born parents (ref.) | 0.000 | - | 0.000 | - | 0.000 | - | 0.000 | - |
| Born in Sweden to one Swedish-born parent | 0.018 | -0.015, 0.051 | -0.005 | -0.036, 0.026 | 0.020 | -0.029, 0.069 | 0.034 | -0.017, 0.084 |
| Born in Sweden with two parents born abroad | 0.048* | 0.002, 0.094 | 0.079* | 0.017, 0.142 | 0.096** | 0.034, 0.158 | 0.098** | 0.026, 0.171 |
| Born abroad | 0.189*** | 0.133, 0.246 | 0.219*** | 0.153. 0.285 | 0.043 | -0.028, 0.115 | 0.195*** | 0.113, 0.278 |
|  |  |  |  |  |  |  |  |  |
| Living arrangements (at age 16) |  |  |  |  |  |  |  |  |
| Both parents in the same household (ref.) | 0.000 | - | 0.000 | - | 0.000 | - | 0.000 | - |
| Shared residence | 0.003 | -0.025, 0.030 | 0.029 | -0.001, 0.058 | 0.035 | -0.012, 0.082 | 0.024 | -0.025, 0.072 |
| Lives with one parent | 0.047* | 0.010, 0.084 | 0.027 | -0.017, 0.071 | 0.032 | -0.015, 0.078 | 0.124*** | 0.062, 0.186 |
| Other | 0.207*** | 0.103, 0.311 | 0.157** | 0.064, 0.249 | 0.128 | -0.010, 0.267 | -0.087 | -0.189, 0.015 |
|  |  |  |  |  |  |  |  |  |
| Psychiatric conditions (at or before age 16) |  |  |  |  |  |  |  |  |
| No (ref.) | 0.000 | - | 0.000 | - | 0.000 | - | 0.000 | - |
| Yes | 0.075*** | 0.033, 0.116 | 0.099*** | 0.048, 0.149 | 0.122*** | 0.070, 0.174 | 0.135*** | 0.072, 0.198 |

***p<0.001 **p<0.01

a Excluding 7 students who were the only members of their class, in order to estimate school fixed effects.

b Excluding 10 students who were the only members of their class, in order to estimate school fixed effects.

c Excluding 9 students who were the only members of their class, in order to estimate school fixed effects.

d Excluding 14 students who were the only members of their class, in order to estimate school fixed effects.

Figure S2. Predicted probabilities (in percentages) and observed prevalence of ineligibility for upper secondary school at age 16, by level of psychosomatic complaints for females (n = 2,699) and males (n = 2,630), respectively.

Figure S3. Predicted probabilities (in percentages) and observed prevalence of non-graduation from upper secondary school by age 20, by level of psychosomatic complaints for females (n = 2,458) and males (n = 2,329), respectively.
